# Supplementary material for: Ratiometric dual-emitting thermometers based on rhodamine B dye-incorporated (nano) curcumin periodic mesoporous organosilicas for bioapplications
Source: PubMed Central journal article supplement — J Mater Chem C Mater. 2024 Mar 22;12(16):5836–48. doi: 10.1039/d3tc04416e (PMC11044629; doi:10.1039/d3tc04416e), 2024-03-22
Supplement: TC-012-D3TC04416E-s001.pdf [file TC-012-D3TC04416E-s001.pdf]

## Supporting Information

# Ratiometric Dual-Emitting Thermometers Based on Rhodamine B Dye- Incorporated (Nano) Curcumin Periodic Mesoporous Organosilicas for Bioapplications

---

Chunhui Liu<sup>a,b,c</sup>, Simona Premcheska<sup>c,d</sup>, Andre Skirtach<sup>d</sup>, Dirk Poelman<sup>b</sup>, Anna M. Kaczmarek<sup>c\*</sup>, and Pascal Van Der Voort<sup>a\*</sup>

<sup>a</sup>COMOC - Center for Ordered Materials Organometallics and Catalysis, Department of Chemistry, Ghent University, Krijgslaan 281 S3, 9000 Ghent;

<sup>b</sup>Lumilab, Department of Solid State Sciences, Ghent University, Krijgslaan 281 S1, 9000 Ghent;

<sup>c</sup>NanoSensing Group, Department of Chemistry, Ghent University, Krijgslaan 281 S3, 9000 Ghent

<sup>d</sup>

\* Corresponding authors: Email: [Anna.Kaczmarek@UGent.be](mailto:Anna.Kaczmarek@UGent.be) ; Email: [Pascal.VanDerVoort@UGent.be](mailto:Pascal.VanDerVoort@UGent.be)

**Table S1** Preparation of PMO@dye.

| Material (x=) | C-PMO@RhBx@LB |            | CP-PMO@RhBx@LB |            |
|---------------|---------------|------------|----------------|------------|
|               | Rhb (mg)      | Water (mL) | Rhb (mg)       | Water (mL) |
| 1             | 0.1           | 2          | 0.1            | 2          |
| 2             | 0.1           | 4          | 0.1            | 10         |
| 3             | 0.1           | 10         | 0.1            | 20         |
| 4             | 0.1           | 20         |                |            |

**Table S2** Fitting parameters of prepared C-PMO and CP-PMO.

| Material       | $\Delta_0$ | $\alpha$             | $\Delta E$ (cm <sup>-1</sup> ) |
|----------------|------------|----------------------|--------------------------------|
| C-PMO@RhB3@LB  | 3.47       | 3.13*10 <sup>5</sup> | 3065.4                         |
| CP-PMO@RhB1@LB | 0.41       | 5.89*10 <sup>5</sup> | 2936.5                         |

$\Delta_0$  is the thermometric parameter at T = 0 K.;  $\alpha = W_0/W_R$  is the ratio between the nonradiative rates ( $W_0$  is at T = 0 K) and radiative rates ( $W_R$ );  $\Delta E$  is the activation energy of the nonradiative process.

**Table S3.** Comparison to the maximum relative sensitivities of several previously reported luminescent host-guest MOFs for temperature sensing.

| Materials                     | Temperature range     | Max $S_r$               | $T_m$         | Ref.      |
|-------------------------------|-----------------------|-------------------------|---------------|-----------|
| DSM@ZnPZDDI                   | 298-338 K             | 0.44 %·K <sup>-1</sup>  | 298 K         | 5         |
| DSM@ZJU-56                    | 298-343 K             | 1.11 %·K <sup>-1</sup>  | 298 K         |           |
| Rh101@UiO-67                  | 293-333 K             | 1.30 %·K <sup>-1</sup>  | 333 K         | 6         |
| ZJU-88 $\rightarrow$ perylene | 293-353 K             | 1.28 %·K <sup>-1</sup>  | 293 K         | 7         |
| TbTATAB $\rightarrow$ C460    | 100-300 K             | 4.484 %·K <sup>-1</sup> | 300 K         | 8         |
| CsPbBr <sub>3</sub> @Eu-BTC   | 20-100 °C (293-373 K) | 3.9 %·K <sup>-1</sup>   | 20 °C (293 K) | 9         |
| RhB@IRMOF-3                   | 20-70 °C (293-343 K)  | 0.87 %·K <sup>-1</sup>  | 70 °C (343 K) | 10        |
| FL@IRMOF-3                    | 20-80 °C (293-353 K)  | 0.66 %·K <sup>-1</sup>  | 80 °C (353 K) |           |
| Dye <sub>0.01</sub> @Eu-BTC   |                       | 0.50 %·K <sup>-1</sup>  | 363 K         |           |
| Dye <sub>0.005</sub> @Eu-BTC  | 283-363 K             | 0.45 %·K <sup>-1</sup>  | 363 K         | 11        |
| Dye <sub>0.001</sub> @Eu-BTC  |                       | 0.30 %·K <sup>-1</sup>  | 363 K         |           |
| RhB@ZnNDPA                    | 30-90 °C (303-363 K)  | 0.42 %·K <sup>-1</sup>  | 30 °C (303 K) | 12        |
| ZJU-21 $\rightarrow$ DMASM    | 20-80 °C (293-353 K)  | 5.20%·K <sup>-1</sup>   | 20 °C (293 K) | 13        |
| C-PMO@RhB@LB                  | 293-343 K             | 1.69%·K <sup>-1</sup>   | 343 K         |           |
| CP-PMO@RhB@LB                 | 293-343 K             | 2.60%·K <sup>-1</sup>   | 343 K         | This work |

$S_r$  is relative sensitivity;  $T_m$  is temperature when  $S_r$  is maximum.

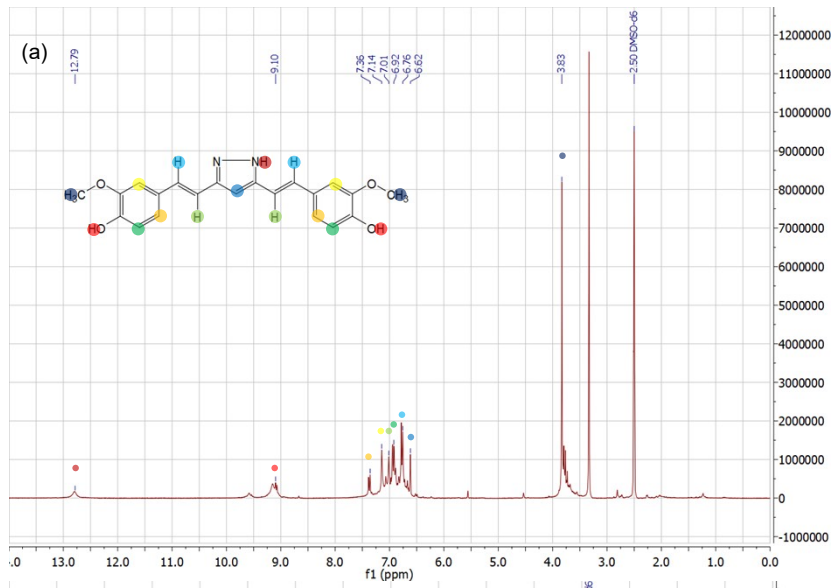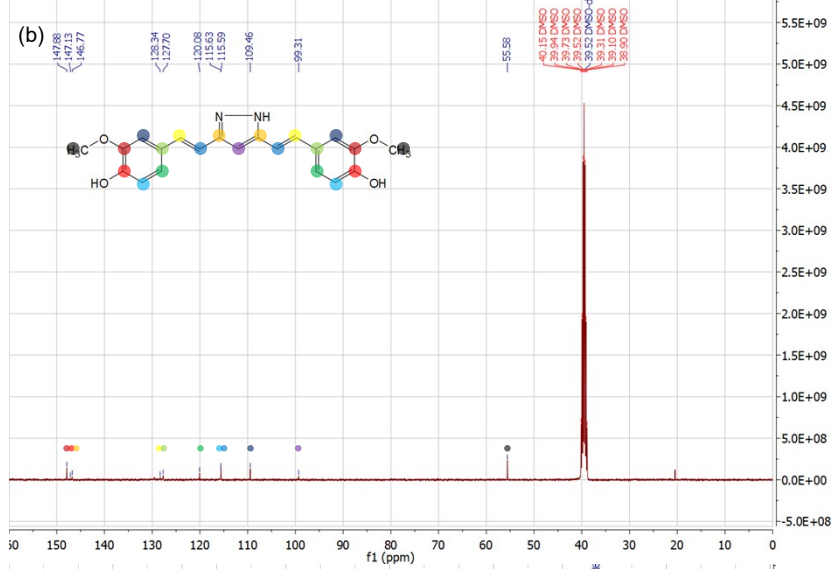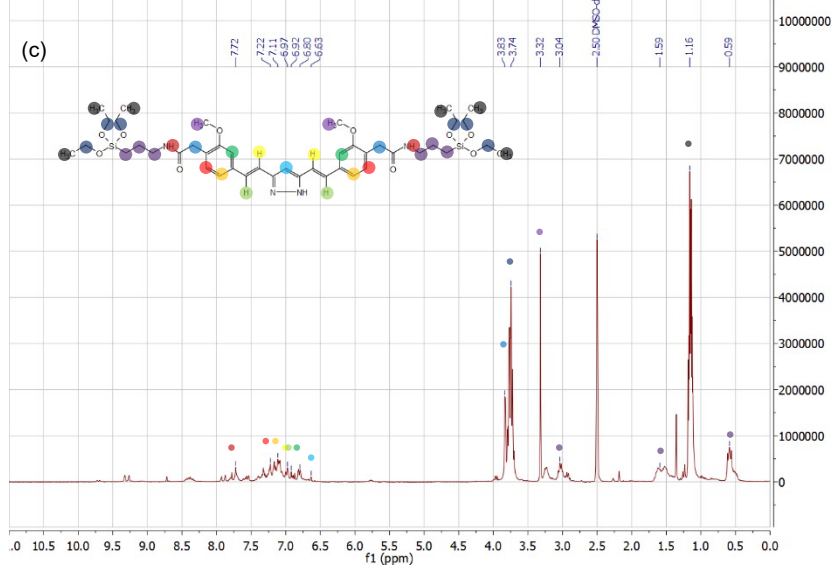

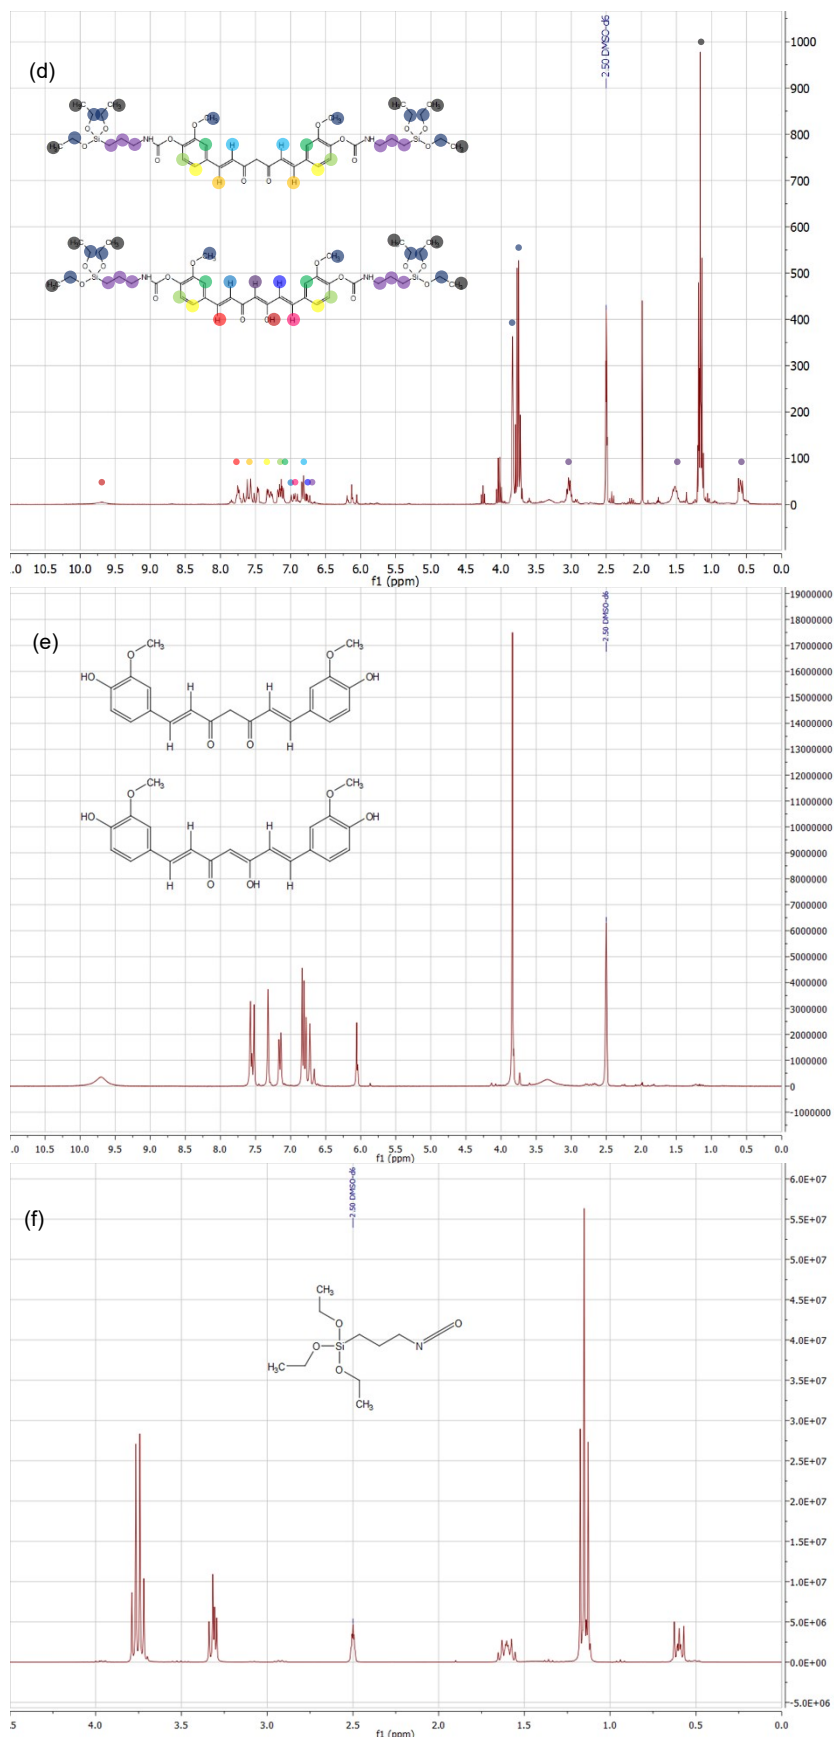

Figure S 1  $^1\text{H}$  NMR of (a) curcumin-pyrazole analog, 1c; (c) curcumin-pyrazole-Si, 1d; (d) curcumin-Si, 1b (e) curcumin, 1a; (f) (3-Isocyanatopropyl) triethoxysilane (IPTES), and  $^{13}\text{C}$  NMR of (b) curcumin-pyrazole analog, 1c.

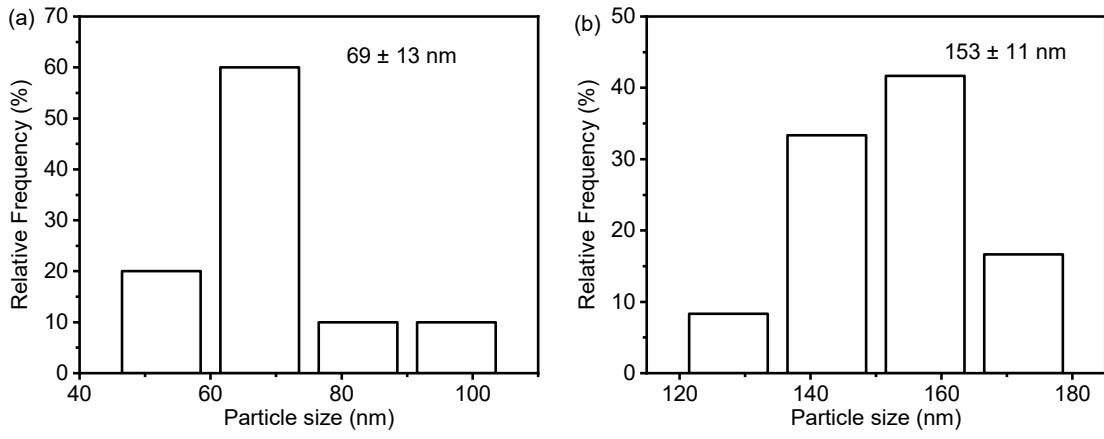

Figure S 2 Histograms showing the particle size distribution of: (a) C-PMO; (b) CP-PMO. The particle size is based on collected TEM images.

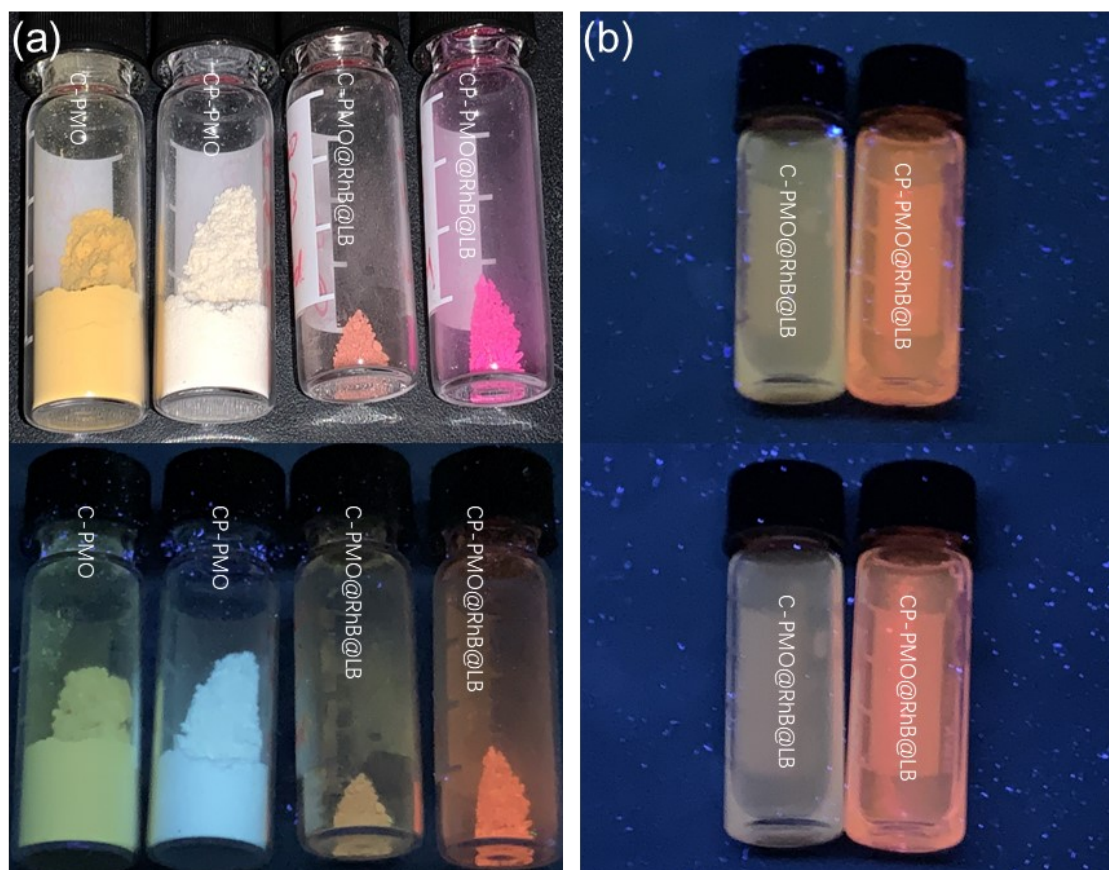

Figure S 3 Photograph of the prepared PMO@RhB@LB samples at (a) daylight (up) and when placed under a laboratory UV lamp with an excitation wavelength of 365 nm (down); (b) 293 K (20 °C) in water (up), and 343 K (70 °C) in water (down) under a laboratory UV lamp of 365 nm excitation.

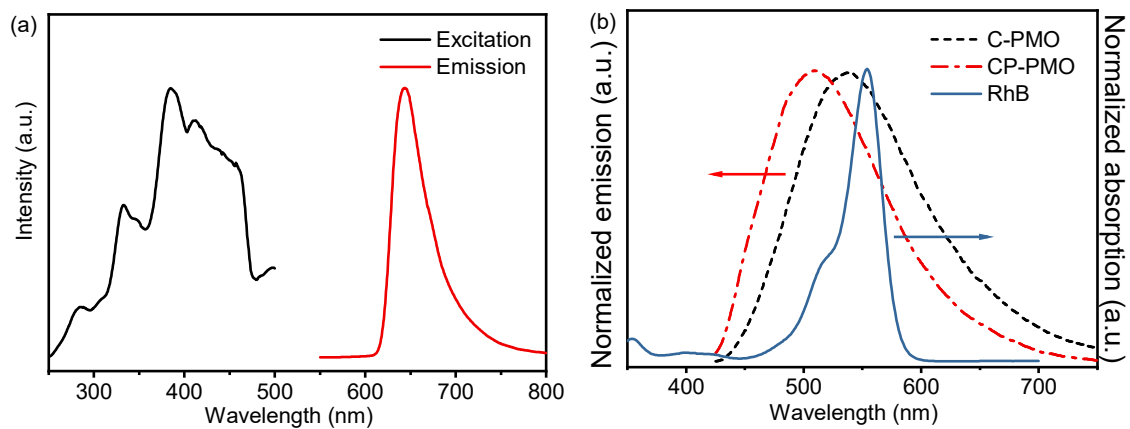

Figure S 4 (a) Excitation and emission spectra of RhB in water at room temperature (excited at 417 nm observed at 641 nm). (b) Emission spectra of the two PMOs – C-PMO AND CP-PMO (excited at 417 nm) and UV-vis absorption spectrum of RhB in water at room temperature.

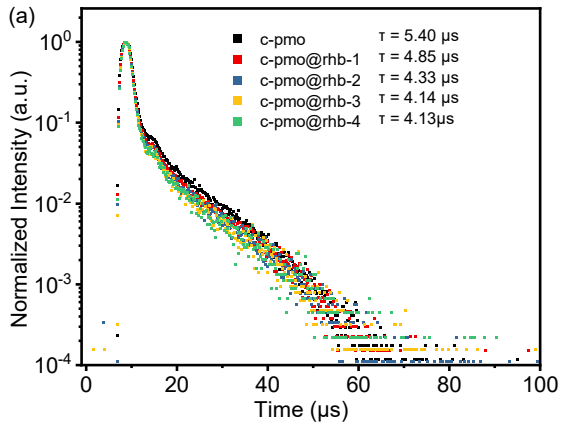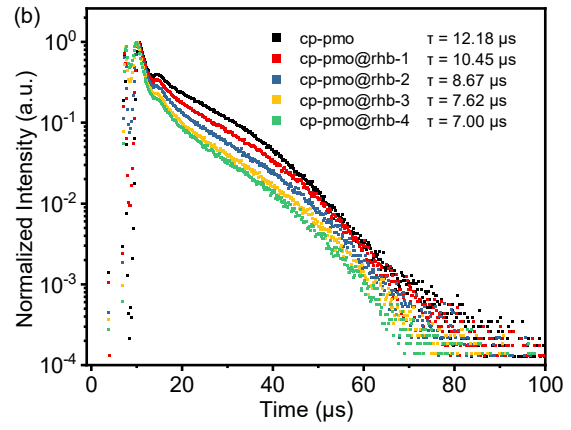



Figure S 5 Luminescence decay profiles of (a)C-PMO, and (b) CP-PMO in water upon added increasing concentrations of RhB water solution, ex = 417 nm, em = 525 nm ( $\tau$ : average decay time).

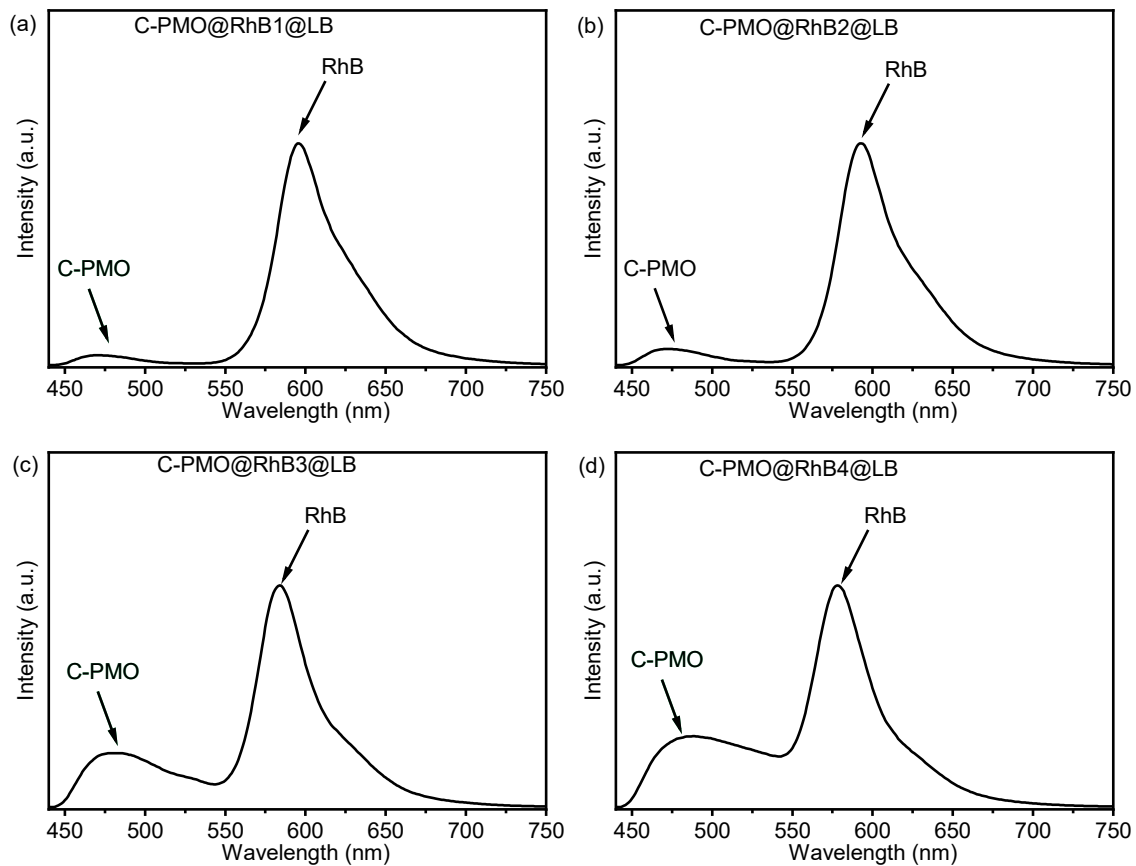

Figure S 6 Emission spectra of C-PMO@RhB with different dye contents in water excited at 417 nm.



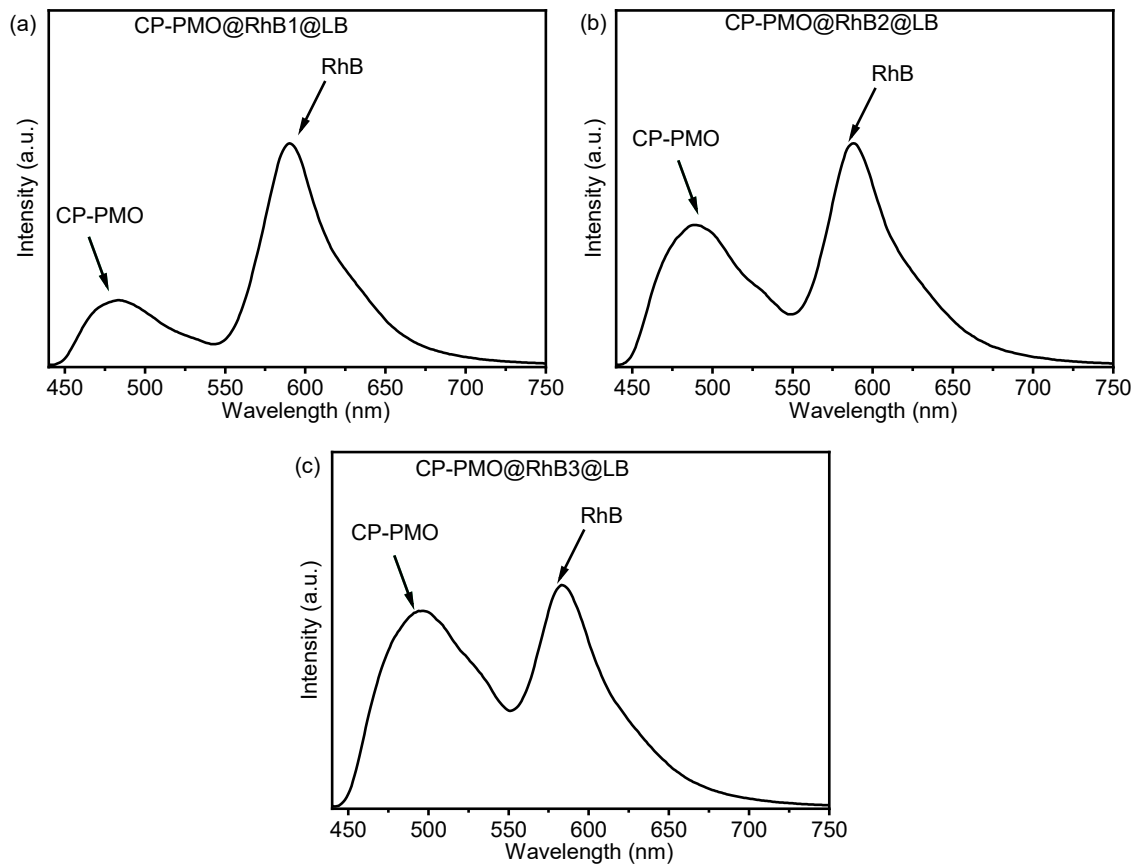

Figure S 7 Emission spectra of CP-PMO@RhB with different dye contents in water excited at 417 nm.

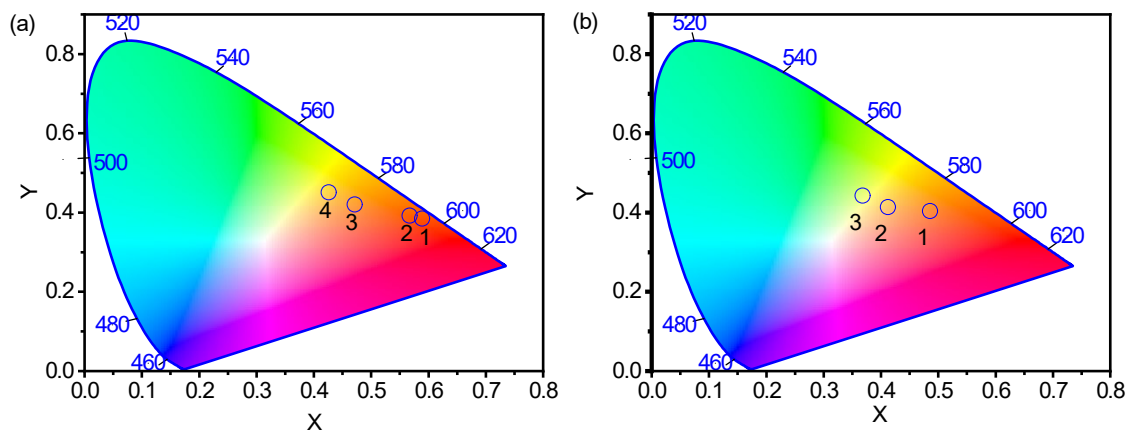

Figure S 8 CIE chromaticity diagram for (a)C-PMO@RhBx@LB (x=1~4) and (b) C-PMO@RhBx@LB (x=1~3) with decreasing dye contents excited at 417 nm.



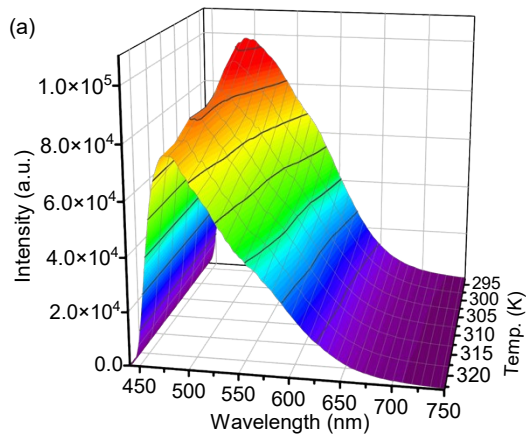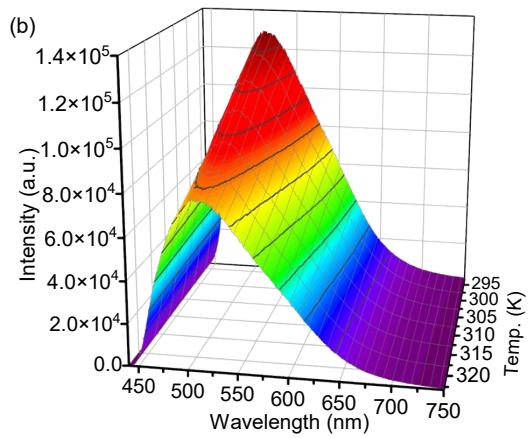

Figure S 9 Temperature-dependent emission spectra of (a) C-PMO and (b)CP-PMO dispersed in water recorded from 293.15 to 323.15 K, excited at 417 nm.





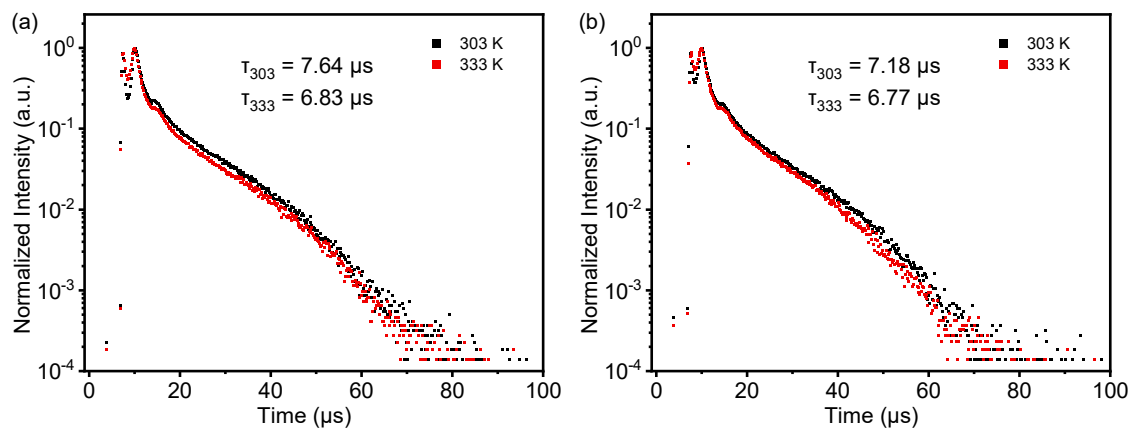

Figure S 10 Luminescence decay profile of (a)C-PMO in water, ex = 417 nm, em = 539 nm; (b) CP-PMO in water, ex = 417 nm, em = 533 nm.



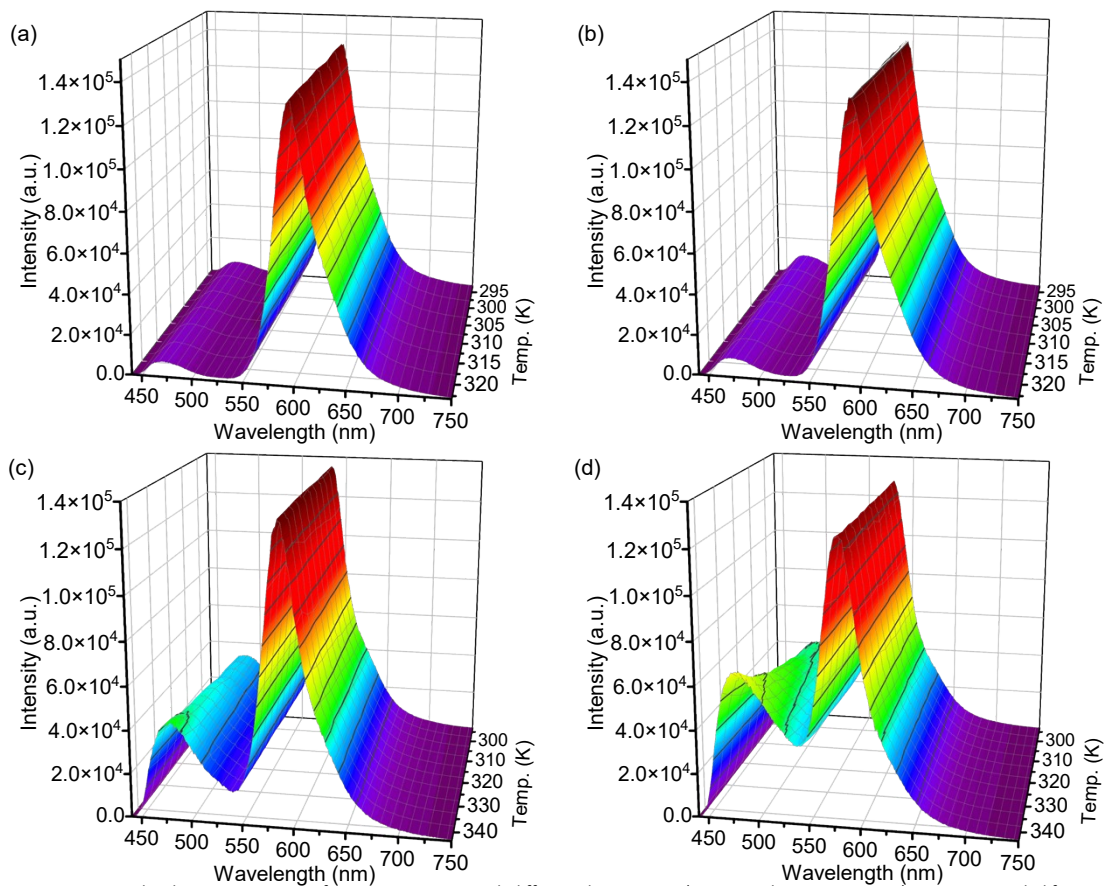

Figure S 11 Normalized Emission spectra of C-PMO@RhB@LB with different dye contents (C-PMO@RhBx@LB, x = 1 - 4) in water recorded from 293.15 to 343.15 K, excited at 417 nm.

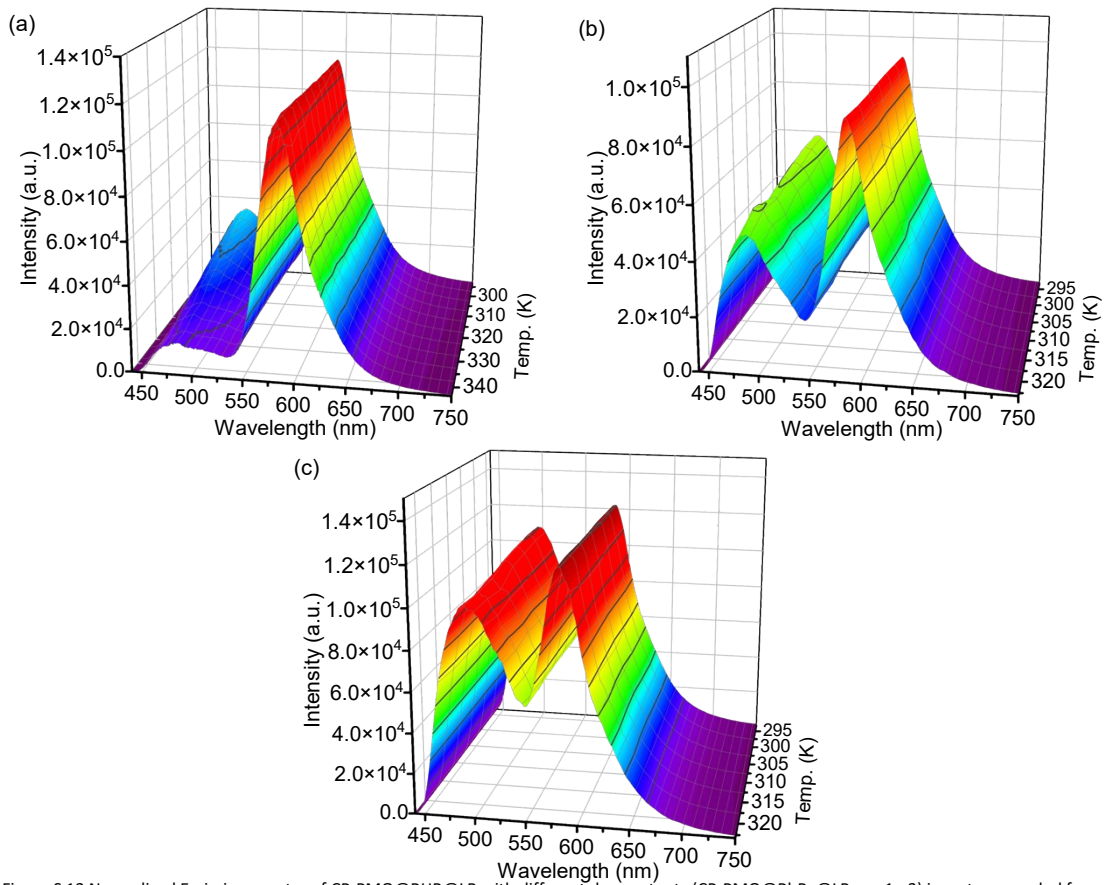

Figure S 12 Normalized Emission spectra of CP-PMO@RHB@LB with different dye contents (CP-PMO@RhB<sub>x</sub>@LB, x = 1 - 3) in water recorded from 293.15 to 343.15 K, excited at 417 nm.

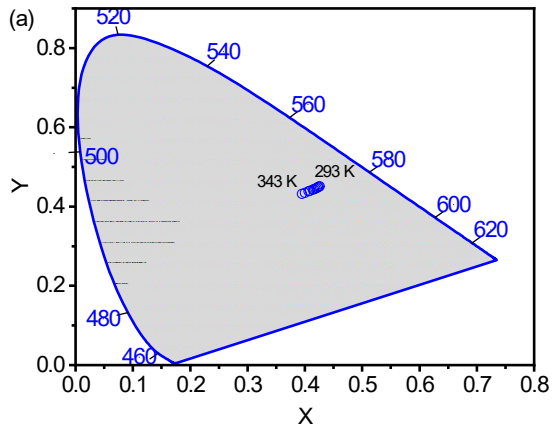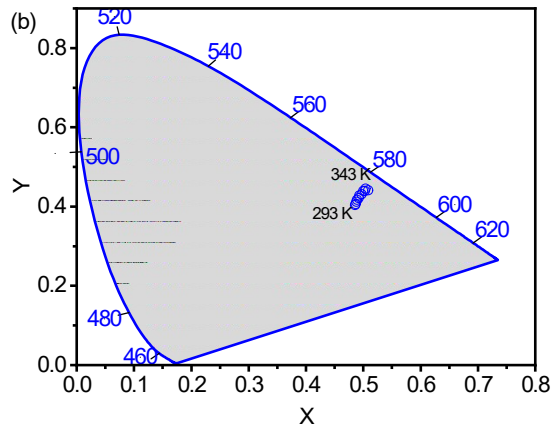

a

Figure S 13 CIE coordinates diagram for (a) C-PMO@RhB@LB; (b) CP-PMO@RhB@LB at different temperatures (293–343 K).

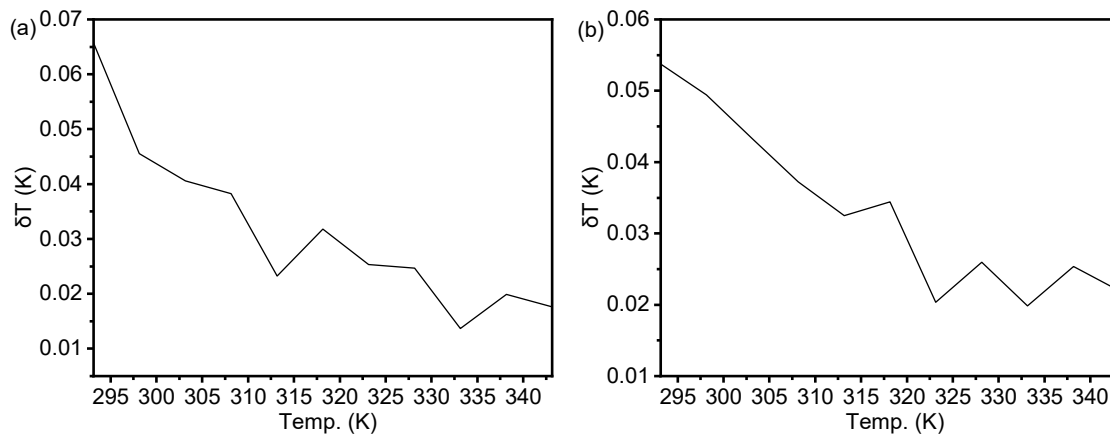

Figure S 14 Temperature uncertainty for (a) C-PMO@RhB@LB; (b) CP-PMO@RhB@LB at varying temperatures (293-343 K).





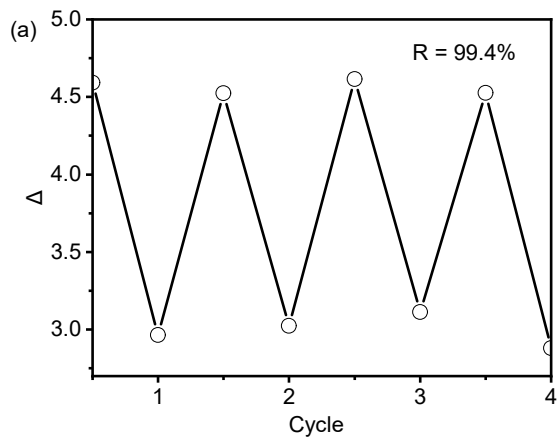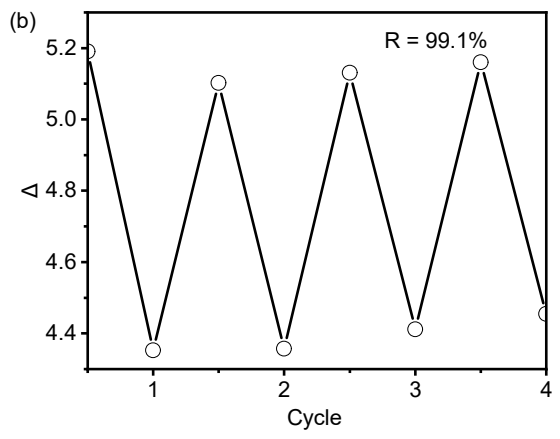

Figure S 15 Cycle tests for (a)C-PMO@RhB@LB, and (b) CP-PMO@RhB@LB (R - repeatability).

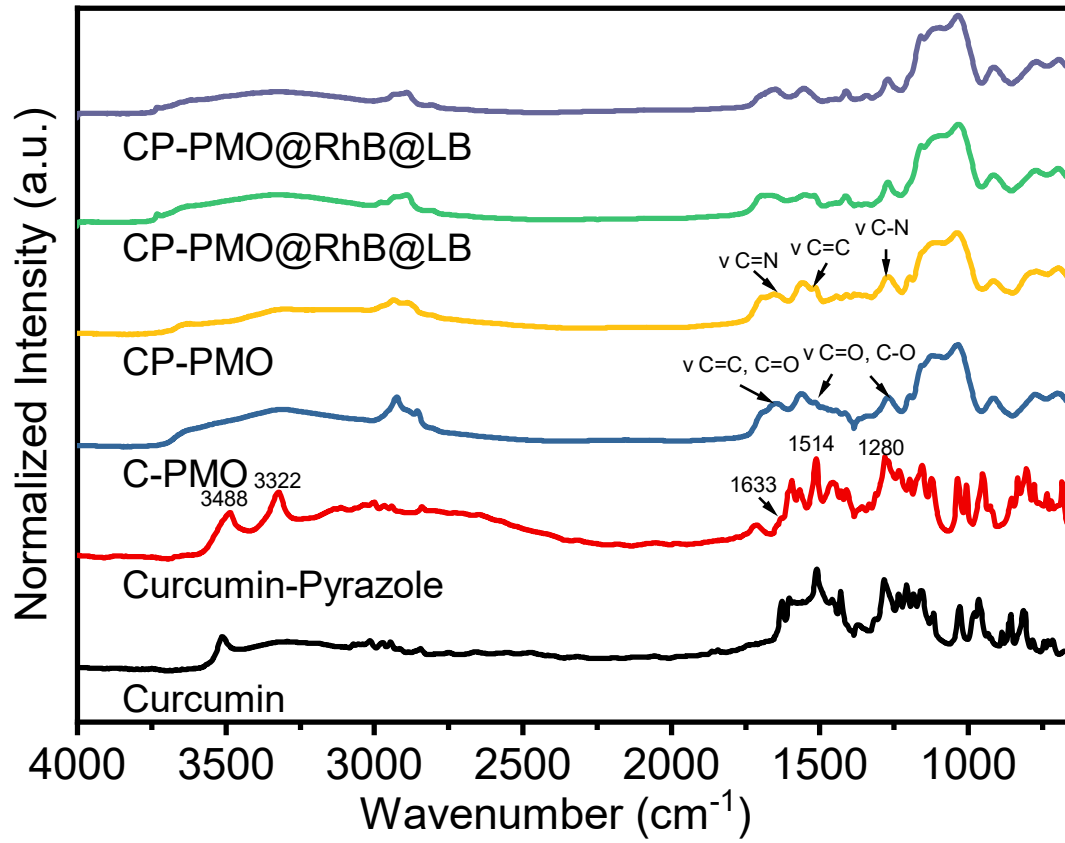

Figure S 16 FTIR spectra of PMO@RhB@LB.

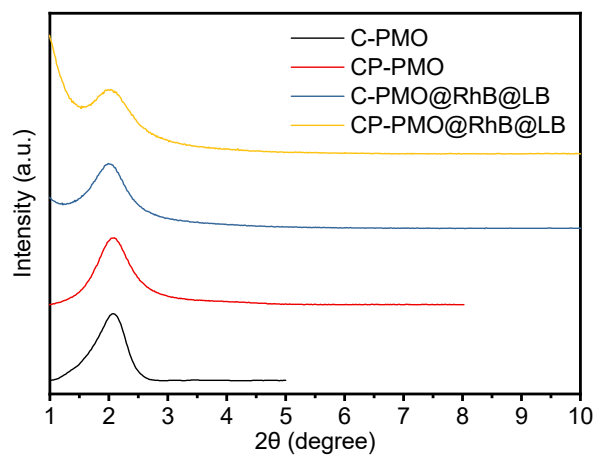

Figure S 17 PXRD patterns of PMOs@RhB@LB

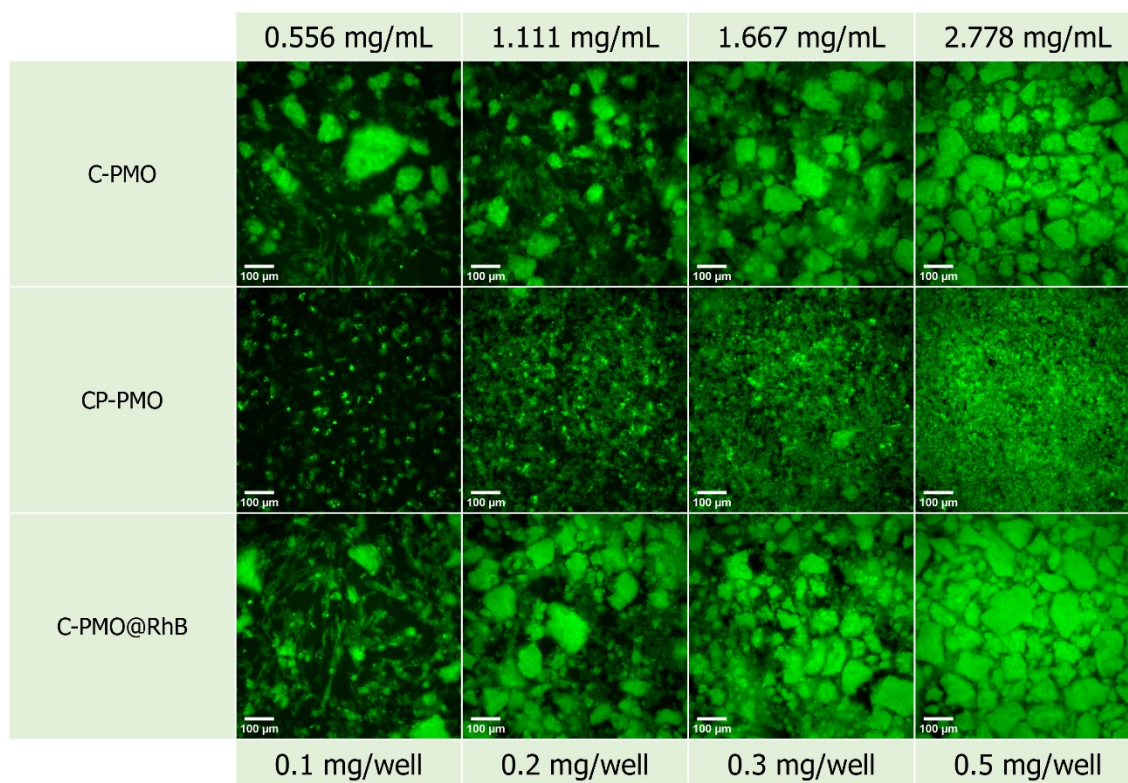

Figure S 18 Fluorescence microscopy images of the technical replicates with stained NHDF cells for the three samples (C-PMO, CP-PMO, C-PMO@RhB@LB) in the range of 0.1-0.5 mg/well. Calcein-AM was used as the cell stain at a final well concentration of 1.5  $\mu$ M. All scale bars are set to 100  $\mu$ m.

## References

1. A. M. Kaczmarek, R. Van Deun and M. K. Kaczmarek, *Sens. Actuators B Chem.*, 2018, **273**, 696-702.
2. S. Datz, H. Engelke, C. V. Schirnding, L. Nguyen and T. Bein, *Microporous Mesoporous Mater.*, 2016, **225**, 371-377.
3. N. Ahsan, S. Mishra, M. K. Jain, A. Surolia and S. Gupta, *Sci. Rep.*, 2015, **5**, 1-16.
4. H. Rijckaert, S. Premcheska, S. Mohanty, J. Verduijn, A. Skirtach and A. M. Kaczmarek, *Physica B Condens. Matter*, 2022, **626**, 413453.
5. S. Wang, M. Gong, X. Han, D. Zhao, J. Liu, Y. Lu, C. Li and B. Chen, *ACS Appl. Mater. Interfaces*, 2021, **13**, 11078-11088.
6. Y. Zhou, D. Zhang, J. Zeng, N. Gan and J. Cuan, *Talanta*, 2018, **181**, 410-415.
7. Y. Cui, R. Song, J. Yu, M. Liu, Z. Wang, C. Wu, Y. Yang, Z. Wang, B. Chen and G. Qian, *Adv. Mater.*, 2015, **27**, 1420-1425.
8. T. Xia, T. Song, Y. Cui, Y. Yang and G. Qian, *Dalton Trans.*, 2016, **45**, 18689-18695.
9. J. Liu, Y. Zhao, X. Li, J. Wu, Y. Han, X. Zhang and Y. Xu, *Cryst. Growth Des.*, 2019, **20**, 454-459.
10. C. He, H. Yu, J. Sun, C. Zhou, X. Li, Z.-M. Su, F. Liu and V. Khakhinov, *Dyes Pigm.*, 2022, **198**, 110000.
11. J. Liu, X. Yue, Z. Wang, X. Zhang and Y. Xu, *J Mater Chem C*, 2020, **8**, 13328-13335.
12. M. Y. Gong, Z. J. Li, W. Q. Xiang, T. F. Xia and D. Zhao, *J Solid State Chem*, 2022, **311**, 123147.
13. D. Zhao, D. Yue, K. Jiang, Y. Cui, Q. Zhang, Y. Yang and G. Qian, *J Mater Chem C*, 2017, **5**, 1607-1613.
